The depression of the respiratory movements of the fetuses appeared to be parallel to the decrease in the respiratory rate of the mother and this is offered as a suggested clue, in the clinical use of nisentil for obstetric analgesia and amnesia, for determining the condition of the respiratory function of the "about-to-be-born" baby.

## REFERENCES

1. Smith, E. J., and Nagyfy, S. F.: Report on Comparative Studies of Newer Drugs Used for Obstetrical Analgesia, *Am. J. Obst. & Gynec.* **58**: 695-702 (Oct.) 1949.
2. Hapke, F. B., and Barnes, A. C.: Obstetric Use and Effect on Fetal Respiration of Nisentil, *Am. J. Obst. & Gynec.* **58**: 799-801 (Oct.) 1949.
3. Lund, C. J.: Choices of Analgesics During First Stage of Labor, *J.A.M.A.* **145**: 1114-1118 (April 14) 1951.
4. Snyder, F. F., and Rosenfeld, M.: Direct Observation of Intrauterine Respiratory Movements of Fetus and Role of Carbon Dioxide and Oxygen in Their Regulation, *Am. J. of Physiol.* **119**: 153-166 (May) 1937.
5. Bonar, B. E., and Blumenfeld, C. M.: Obstetric Anesthesia; Laboratory Method for Studying the Effects of Anesthetic and Analgesic Agents on Both Uterus and Fetus, *Surg., Gynec. & Obst.* **66**: 179-185 (Feb.) 1938.
6. Snyder, F. F.: Prolongation of Pregnancy and Complications of Parturition in the Rabbit Following Induction of Ovulation Near Term, *Bull. Johns Hopkins Hosp.* **54**: 1-23 (Jan.) 1934.
7. Snyder, F. F.: Obstetric Analgesia and Anesthesia, Their Effects Upon Labor and the Child, Philadelphia, W. B. Saunders, 1949.

## THE AMERICAN BOARD OF ANESTHESIOLOGY, INC.

The Oral Examination of the American Board of Anesthesiology, Inc., will be held March 23-26, 1952, at White Sulfur Springs, West Virginia.
